# Supplementary material
Source: Springer Nature journal article supplement (https://www.springermedizin.de/resource/supplementary/12984_2005_46_MOESM4_ESM.pdf/9605192)

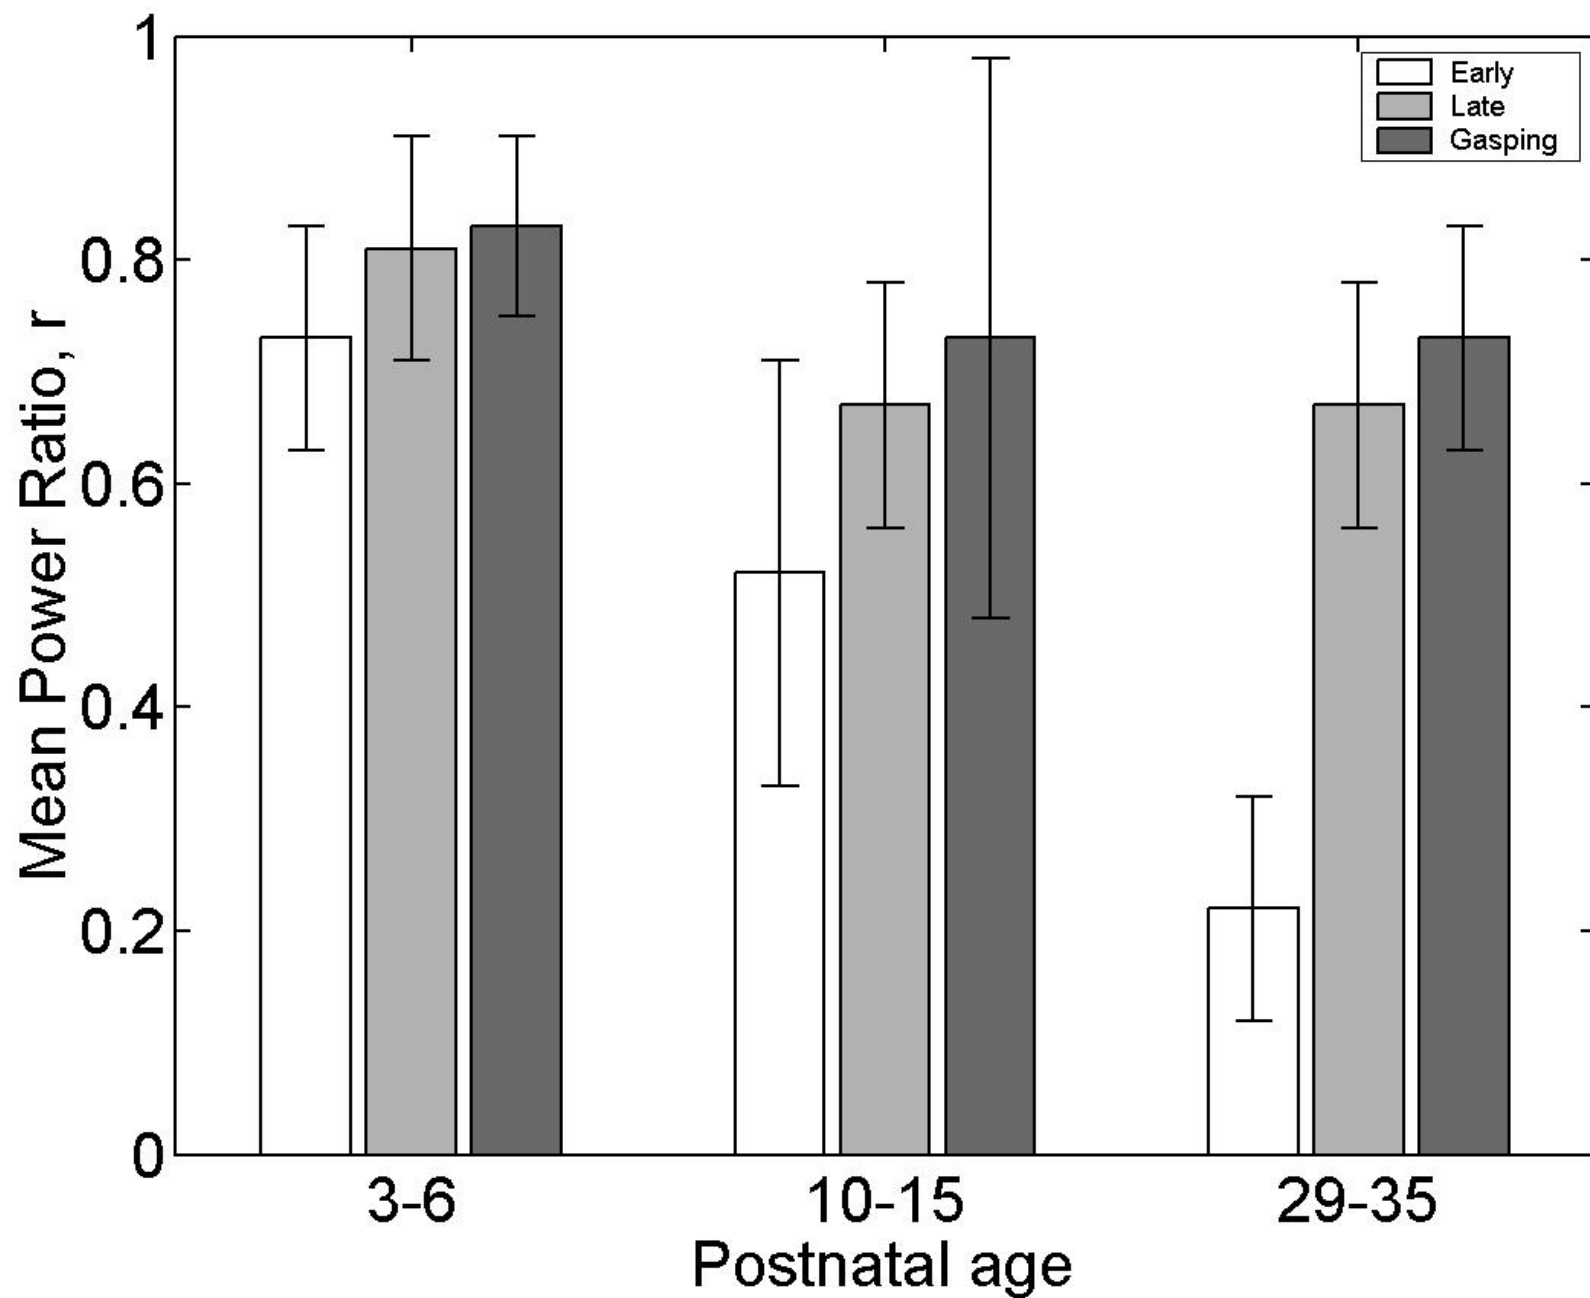

Supplement: MOESM4 [file 9605192]
